# Supplementary figures and images for: A programmed cell death pathway in the malaria parasite Plasmodium falciparum has general features of mammalian apoptosis but is mediated by clan CA cysteine proteases
Source: Springer Nature journal article supplement (doi:10.1038/cddis.2010.2), 2010-02-18

Figure S5

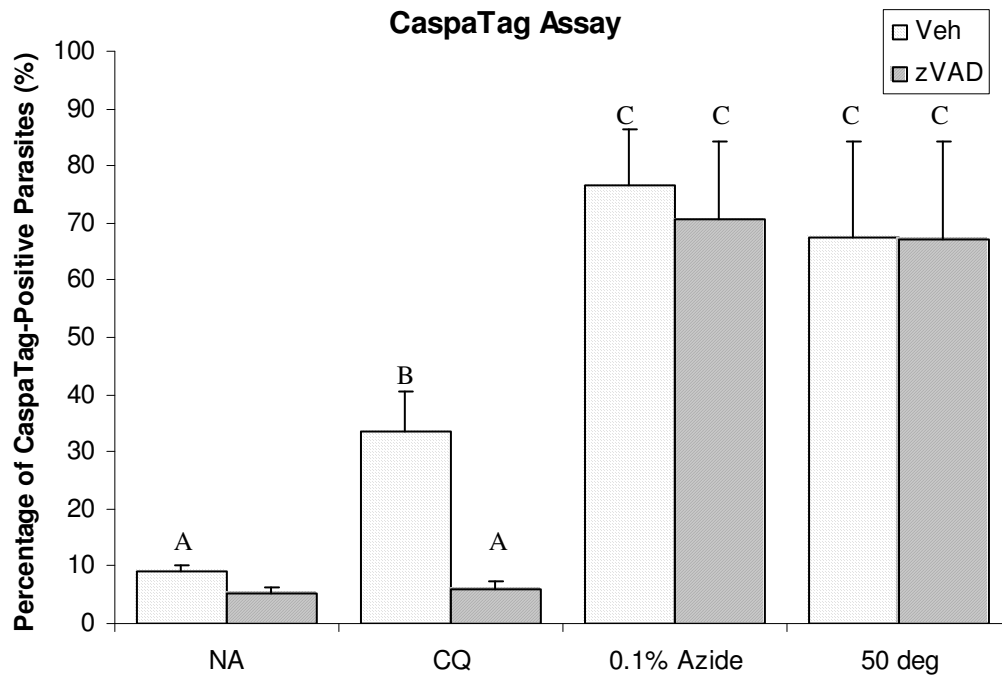

Supplement: 41419_2010_BFcddis20102_MOESM10_ESM.pdf [file 41419_2010_BFcddis20102_MOESM10_ESM.pdf]

Figure S6

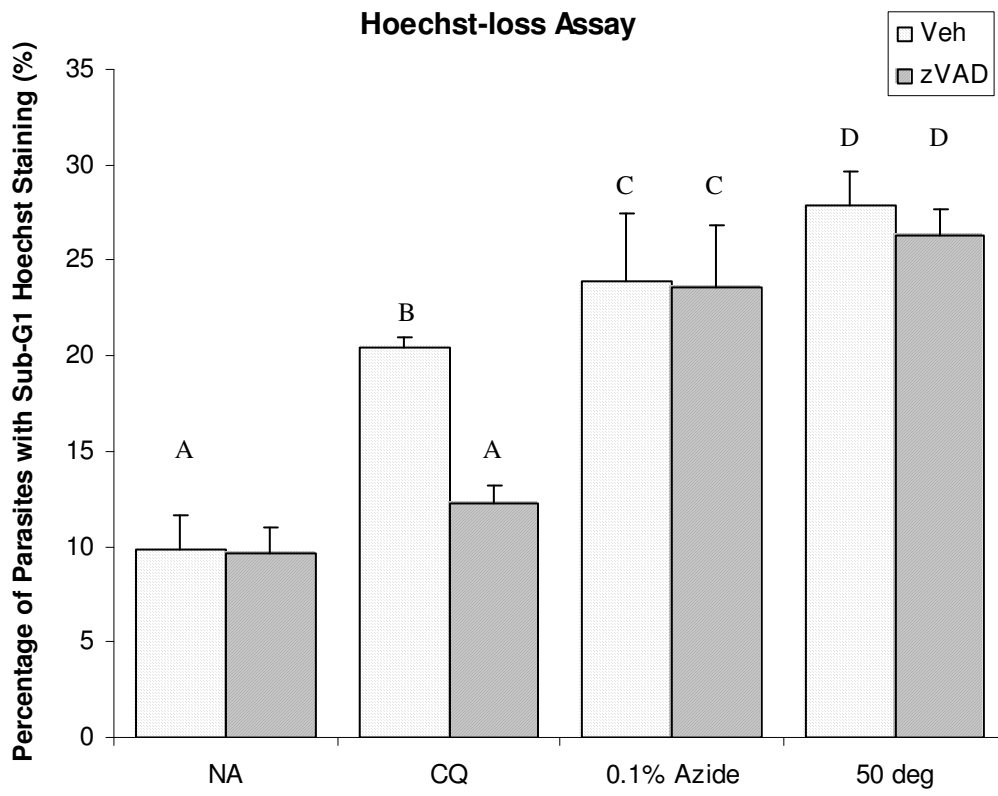

Supplement: 41419_2010_BFcddis20102_MOESM11_ESM.pdf [file 41419_2010_BFcddis20102_MOESM11_ESM.pdf]

Figure S2

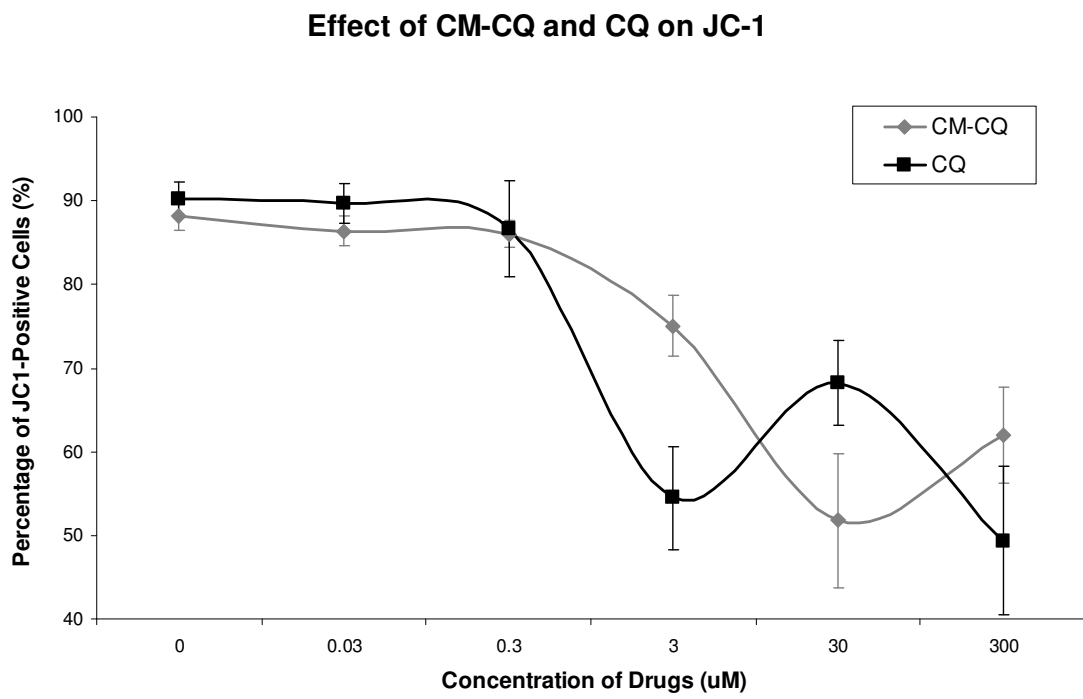

Supplement: 41419_2010_BFcddis20102_MOESM7_ESM.pdf [file 41419_2010_BFcddis20102_MOESM7_ESM.pdf]
