# Supplementary figures and images for: A programmed cell death pathway in the malaria parasite Plasmodium falciparum has general features of mammalian apoptosis but is mediated by clan CA cysteine proteases
Source: PubMed Central journal article supplement — Cell Death Dis. 2010 Feb 18;1(2):e26–. doi: 10.1038/cddis.2010.2 (PMC3032337; doi:10.1038/cddis.2010.2), 2010-02-18

Figure S10

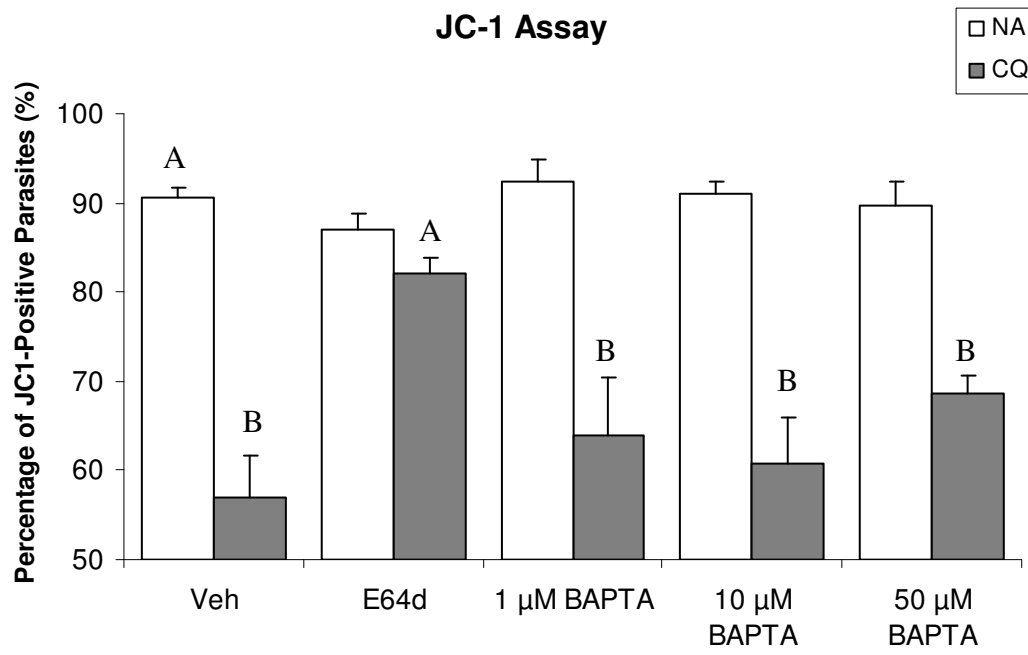

Supplement: cddis20102x10.pdf [file cddis20102x10.pdf]

Figure S3

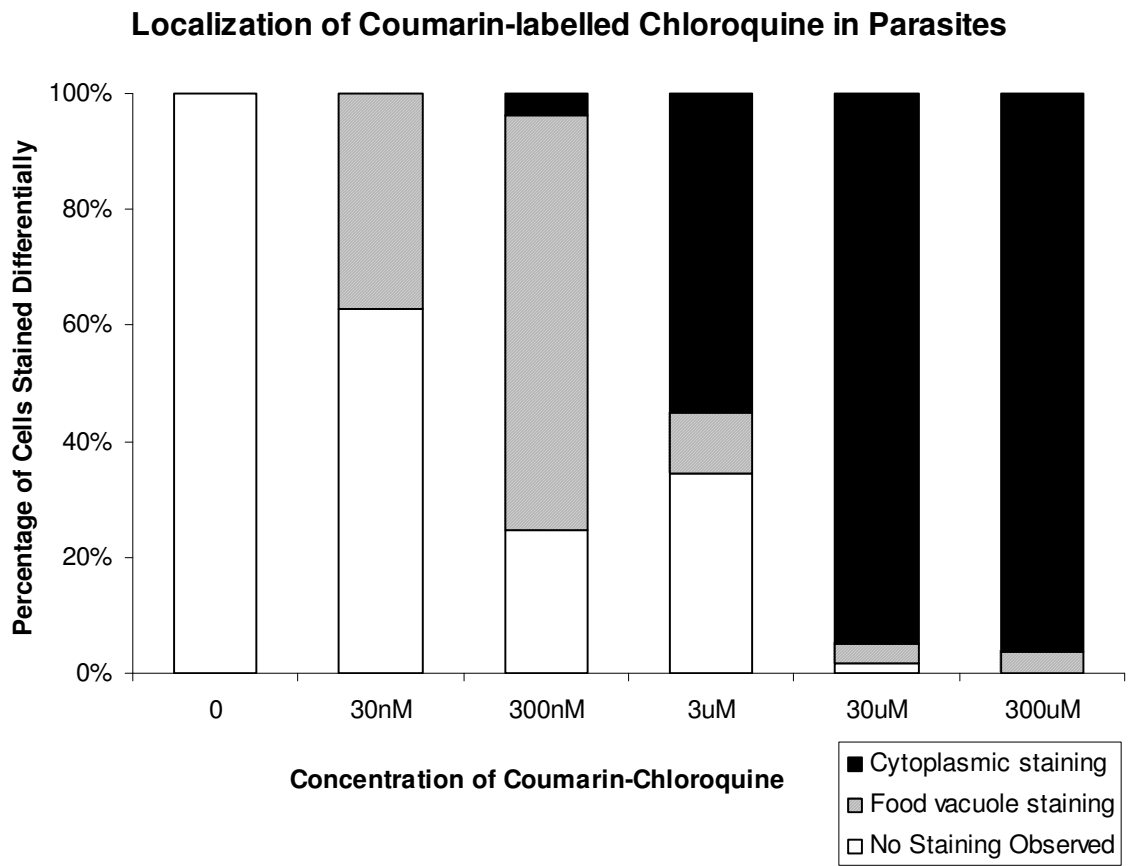

Supplement: cddis20102x3.pdf [file cddis20102x3.pdf]

Figure S4

A.

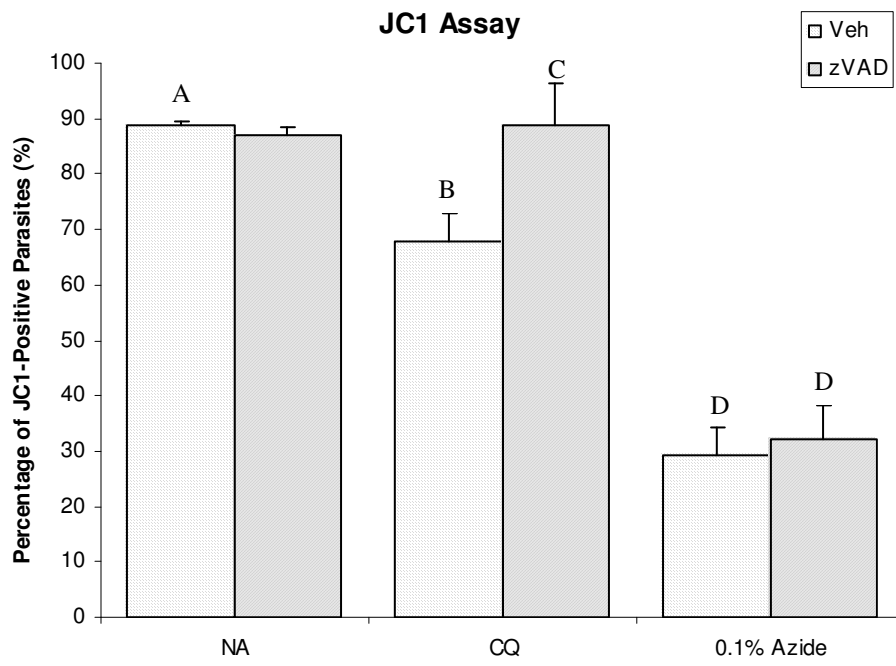

Supplement: cddis20102x4.pdf [file cddis20102x4.pdf]

Figure S9

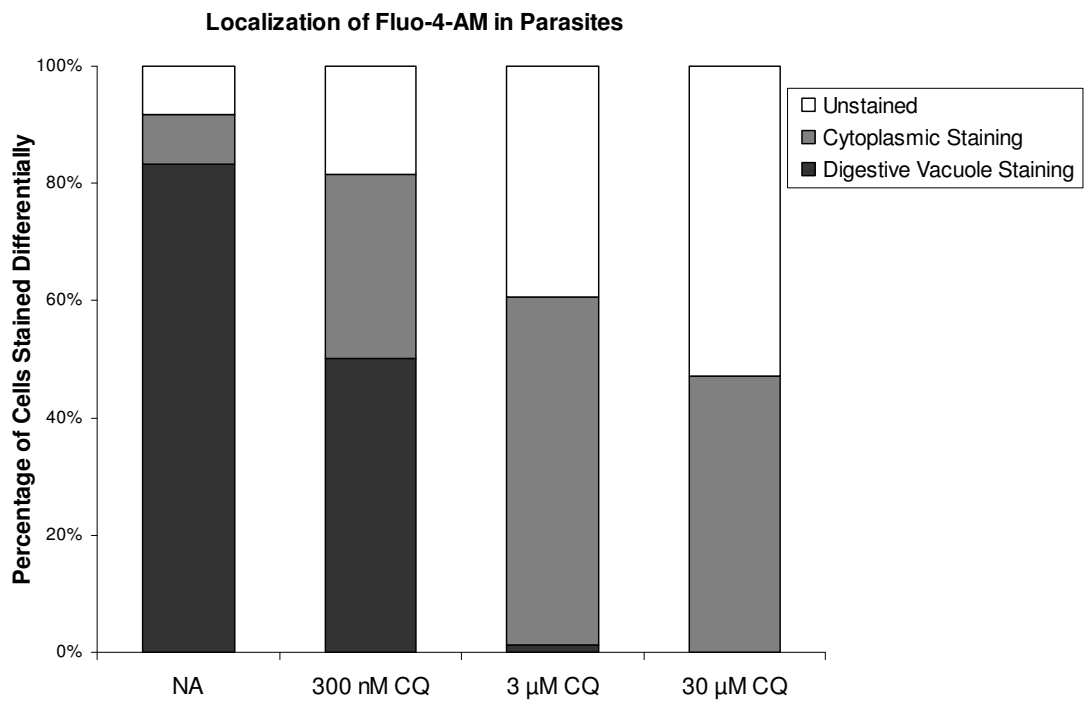

Supplement: cddis20102x9.pdf [file cddis20102x9.pdf]
